# Supplementary material
Source: PubMed Central journal article supplement (PMC3870738)
Supplement: 1306431110_pnas.201306431SI.pdf [file 1306431110_pnas.201306431SI.pdf]

# Supporting Information

Sung et al. 10.1073/pnas.1306431110

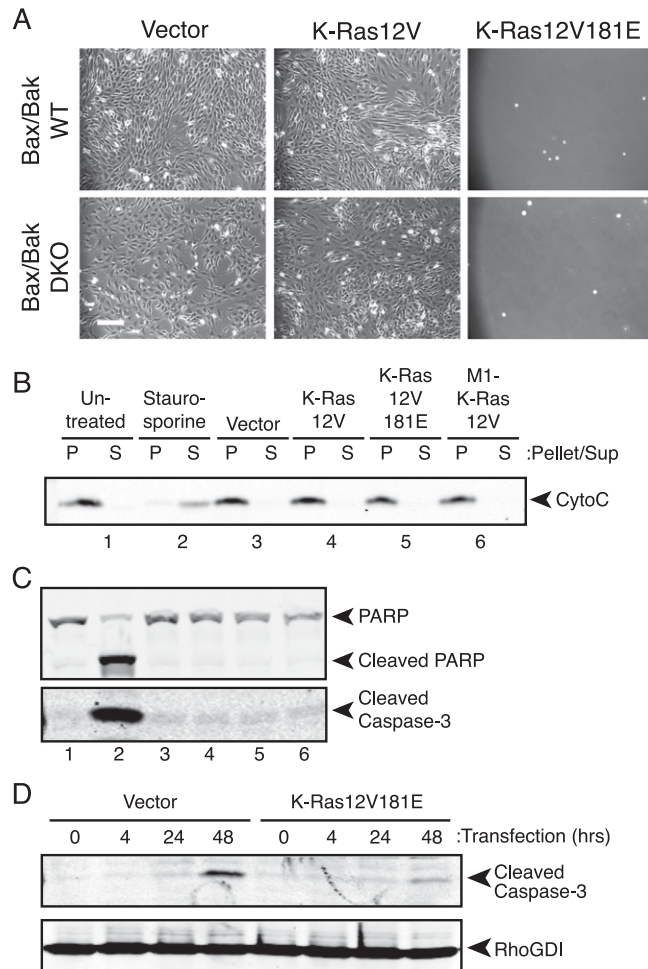

**Fig. S1.** Activated K-Ras with a phosphomimetic amino acid at position 181 does not induce apoptosis. (A) Representative phase contrast images of Bax/Bak WT or double knockout (DKO) murine embryonic fibroblasts (MEFs) transfected with indicated constructs showing clonogenic survival. (Scale bar, 100  $\mu$ m.) (B) COS-1 cells transfected with the indicated construct or treated with 1  $\mu$ M staurosporine, harvested 16 h posttransfection, permeabilized with 0.025% digitonin and separated into pellet [P] and soluble [S] fractions. Fractions were analyzed by SDS/PAGE as cell equivalents and immunoblotted with an anti-cytochrome c antibody. (C) COS-1 cells transfected or treated as in B were immunoblotted for poly-ADP ribose polymerase (PARP) (Upper) or anticlaved caspase-3 (Lower). Numbered lanes correspond to conditions in B. (D) NIH 3T3 cells transfected with vector or K-Ras12V181E, lysed at the indicated times, and analyzed by SDS/PAGE and immunoblot with anticlaved caspase-3 antibody. Immunoblot of RhoGDI demonstrates equal loading. Immunoblots shown are representative of at least three independent experiments.
